# Supplementary material
Source: HighWire-hosted journal article supplement (https://erj.ersjournals.com/content/56/2/1900495)
Supplement: inline-supplementary-material-1 [file inline-supplementary-material-1.pdf]

**SUPPLEMENTARY TABLE S1. Multivariable regression to predict quality of life (QOL) EUROHIS-QOL scores in patients with tuberculosis (TB).** Multivariate model 1 had the best fit with  $R^2=27\%$ . Multivariate model 2 excluded covariates (EC) of QOL (negative affect, number of emotional supports and unsafe neighbourhood) with  $R^2=16\%$ . For the multivariable analyses, variables that did not contribute (NC) significantly to the model were removed in a backward stepwise manner. Note. CI=confidence interval.

|                                | Univariate                  |         | Multivariate model 1        |         | Multivariate model 2 without covariates of QOL |         |
|--------------------------------|-----------------------------|---------|-----------------------------|---------|------------------------------------------------|---------|
|                                | Difference in score (95%CI) | p value | Difference in score (95%CI) | p value | Difference in score (95%CI)                    | p value |
| Age (per decade)               | -0.39<br>(-0.54, -0.23)     | <0.0001 | -0.24<br>(-0.39, -0.11)     | 0.001   | -0.21<br>(-0.37, -0.05)                        | 0.01    |
| Female                         | -0.90<br>(-1.4, -0.39)      | 0.001   | -0.79<br>(-1.3, -0.31)      | 0.001   | -1.5<br>(-2.0, -0.97)                          | <0.0001 |
| Incomplete secondary education | -1.73<br>(-2.4, -1.0)       | <0.0001 | NC                          |         | NC                                             |         |
| Known HIV seropositivity       | -1.4<br>(-2.6, -0.21)       | 0.02    | NC                          |         | -1.6<br>(-2.7, -0.41)                          | 0.008   |
| Self-declared drug use         | -2.2<br>(-2.9, -1.4)        | <0.0001 | -1.4<br>(-2.1, -0.68)       | <0.0001 | -2.2<br>(-2.9, -1.4)                           | <0.0001 |
| Low affect (BDI-II score)      | -0.31<br>(-0.35, -0.28)     | <0.0001 | -0.24<br>(-0.27, -0.20)     | <0.0001 | EC                                             |         |
| Number of emotional supports   | 0.60<br>(0.38, 0.83)        | <0.0001 | 0.30<br>(0.11, 0.51)        | 0.003   | EC                                             |         |
| Unsafe neighborhood            | -1.5<br>(-2.1, -1.0)        | <0.0001 | -0.96<br>(-1.42, -0.50)     | <0.0001 | EC                                             |         |
| <b>TB disease specific</b>     |                             |         |                             |         |                                                |         |
| Previously had TB              | -1.6<br>(-2.2, -1.1)        | <0.0001 | -0.94<br>(-1.5, -0.40)      | 0.001   | -1.4<br>(-1.9, -0.77)                          | <0.0001 |
| TB knowledge                   | 0.02<br>(0.004, 0.04)       | 0.02    | NC                          |         | 0.029<br>(0.01, 0.049)                         | 0.005   |
| TB stigma (EMIC score)         | -0.10<br>(-0.13, -0.08)     | <0.0001 | -0.058<br>(-0.082, -0.033)  | <0.0001 | -0.10<br>(-0.13, -0.07)                        | <0.0001 |
| Pulmonary disease              | -0.54<br>(-1.3, 0.19)       | 0.2     | NC                          |         | NC                                             |         |
| Second line therapy            | -0.93<br>(-1.9, 0.06)       | 0.07    | NC                          |         | NC                                             |         |
| Microbiological confirmation   | -0.77<br>(-1.3, -0.23)      | 0.005   | NC                          |         | NC                                             |         |

|                                          |                                 |                                 |                                 |
|------------------------------------------|---------------------------------|---------------------------------|---------------------------------|
| Number of symptoms                       | -0.41<br>(-0.52, -0.31) <0.0001 | -0.25<br>(-0.34, -0.15) <0.0001 | -0.36<br>(-0.46, -0.26) <0.0001 |
| Duration of symptoms                     | -0.11<br>(-0.17, -0.05) 0.001   | NC                              | -0.066<br>(-0.12, -0.013) 0.02  |
| Interviewed after >14 days of TB therapy | 1.0 (0.31, 1.8) 0.005           | 0.71<br>(0.011, 1.4) 0.05       | 0.93<br>(0.17, 1.7) 0.02        |

**SUPPLEMENTARY TABLE S2.** The EUROHIS-QOL wellbeing tool in the Spanish translation that was used in this study, the original Spanish in sentences that were adapted for cross-cultural harmonization. Note: the pictures below the table were added and shown to study participants only if research staff found that the participant was struggling to understand the responses shown in the box.

| SPANISH TRANSLATION USED IN STUDY                                                                                                                                                           |                                                                                                                                                                              | ORIGINAL SPANISH TRANSLATION                                                                    |                                                        |
|---------------------------------------------------------------------------------------------------------------------------------------------------------------------------------------------|------------------------------------------------------------------------------------------------------------------------------------------------------------------------------|-------------------------------------------------------------------------------------------------|--------------------------------------------------------|
| <i>Por favor, escuche las preguntas, valore sus sentimientos y escoja la mejor opción para usted. Le pedimos que sus respuestas estén en relación a su vida en las últimas dos semanas.</i> |                                                                                                                                                                              |                                                                                                 |                                                        |
| Preguntas                                                                                                                                                                                   | Opciones                                                                                                                                                                     | Preguntas                                                                                       | Opciones                                               |
| 1. ¿Cómo calificaría su calidad de vida?                                                                                                                                                    | <b>A.</b> Muy mala<br><b>B.</b> Regular<br><b>C.</b> Normal<br><b>D.</b> Buena<br><b>E.</b> Muy buena                                                                        |                                                                                                 | <b>D.</b> Bastante buena                               |
| 2. ¿Cuán satisfecho/a está con su salud?                                                                                                                                                    | <b>A.</b> Muy insatisfecho/a<br><b>B.</b> Un poco insatisfecho/a<br><b>C.</b> Ni satisfecho ni insatisfecho<br><b>D.</b> Satisfecho/a<br><b>E.</b> Muy satisfecho/a          | 2. ¿Cómo de satisfecho/a está con su salud?                                                     | <b>C.</b> Lo normal<br><b>D.</b> Bastante satisfecho/a |
| 3. ¿Tiene energía suficiente para su vida diaria?                                                                                                                                           | <b>A.</b> Nada<br><b>B.</b> Un poco<br><b>C.</b> Lo suficiente<br><b>D.</b> Bastante<br><b>E.</b> Totalmente                                                                 |                                                                                                 | <b>C.</b> Lo normal                                    |
| 4. ¿Cuán satisfecho/a está con su habilidad para realizar sus actividades de la vida diaria?                                                                                                | <b>A.</b> Muy insatisfecho/a<br><b>B.</b> Un poco insatisfecho/a<br><b>C.</b> Ni satisfecho ni insatisfecho<br><b>D.</b> Bastante satisfecho/a<br><b>E.</b> Muy satisfecho/a | 4. ¿Cómo de satisfecho/a está con su habilidad para realizar sus actividades de la vida diaria? | <b>B.</b> Poco<br><b>C.</b> Lo normal                  |
| 5. ¿Cuán satisfecho/a está de sí mismo?                                                                                                                                                     | <b>A.</b> Muy insatisfecho/a<br><b>B.</b> Un poco insatisfecho/a<br><b>C.</b> Ni satisfecho ni insatisfecho<br><b>D.</b> Bastante satisfecho/a<br><b>E.</b> Muy satisfecho/a |                                                                                                 | <b>B.</b> Poco<br><b>C.</b> Lo normal                  |
| 6. ¿Cuán satisfecho/a está con sus relaciones personales (entorno social)?                                                                                                                  | <b>A.</b> Muy insatisfecho/a<br><b>B.</b> Un poco insatisfecho/a<br><b>C.</b> Ni satisfecho ni insatisfecho<br><b>D.</b> Bastante satisfecho/a<br><b>E.</b> Muy satisfecho/a | 6. ¿Cómo de satisfecho/a está con sus relaciones personales?                                    | <b>B.</b> Poco<br><b>C.</b> Lo normal                  |
| 7. ¿Tiene suficiente dinero para cubrir sus necesidades?                                                                                                                                    | <b>A.</b> Nada<br><b>B.</b> Un poco<br><b>C.</b> Lo suficiente                                                                                                               |                                                                                                 | <b>C.</b> Lo normal                                    |

|                                                                                                                                                                                                                                                                                                                                                                                                                                                                                                                                                  |                                                                                                                                                                                      |                                                                                                                   |
|--------------------------------------------------------------------------------------------------------------------------------------------------------------------------------------------------------------------------------------------------------------------------------------------------------------------------------------------------------------------------------------------------------------------------------------------------------------------------------------------------------------------------------------------------|--------------------------------------------------------------------------------------------------------------------------------------------------------------------------------------|-------------------------------------------------------------------------------------------------------------------|
|                                                                                                                                                                                                                                                                                                                                                                                                                                                                                                                                                  | <div>D. Bastante</div> <div>E. Totalmente</div>                                                                                                                                      |                                                                                                                   |
| 8. ¿Cuán satisfecho/a está de las condiciones del lugar donde vive?                                                                                                                                                                                                                                                                                                                                                                                                                                                                              | <div>A. Muy insatisfecho/a</div> <div>B. Un poco insatisfecho/a</div> <div>C. Ni satisfecho ni insatisfecho</div> <div>D. Bastante satisfecho/a</div> <div>E. Muy satisfecho/a</div> | 8. ¿Cómo de satisfecho/a está de las condiciones del lugar donde vive? <div>B. Poco</div> <div>C. Lo normal</div> |
| <div>A</div> <div></div> <div>B</div> <div></div> <div>C</div> <div></div> <div>D</div> <div></div> <div>E</div> <div></div> |                                                                                                                                                                                      |                                                                                                                   |

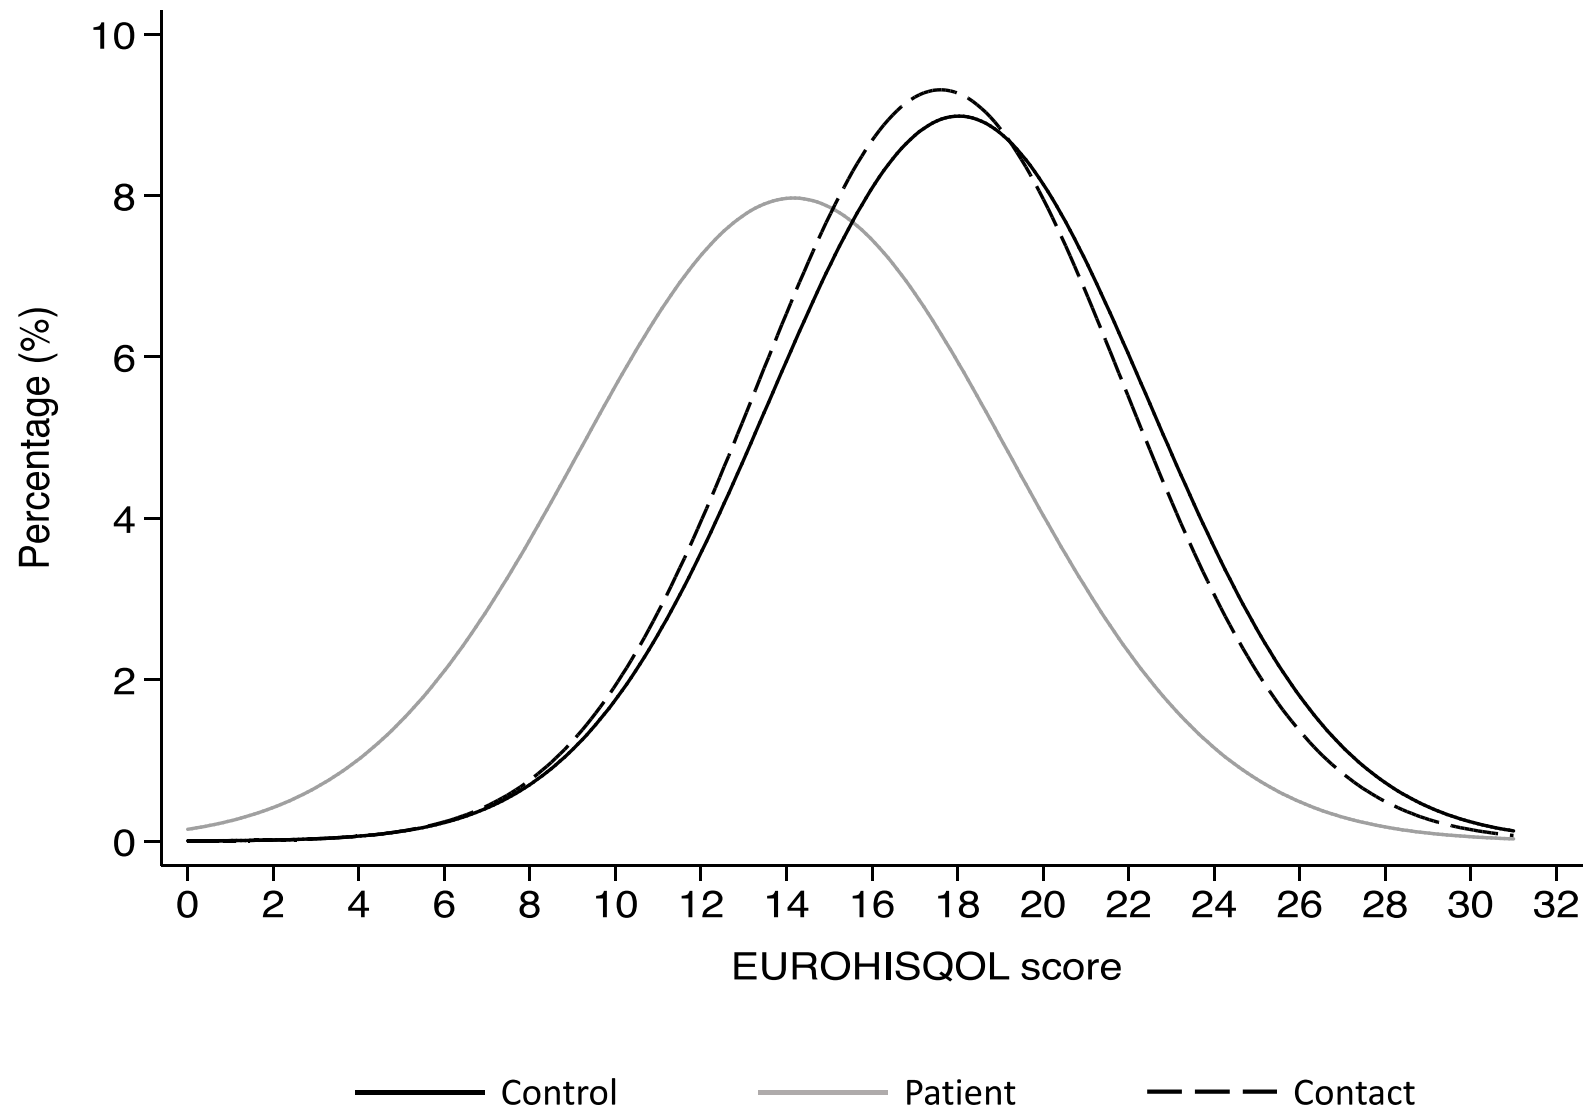

**SUPPLEMENTARY FIGURE S1. Distribution of quality of life (QOL) EUROHIS-QOL scores at baseline** in controls, patients and contacts.

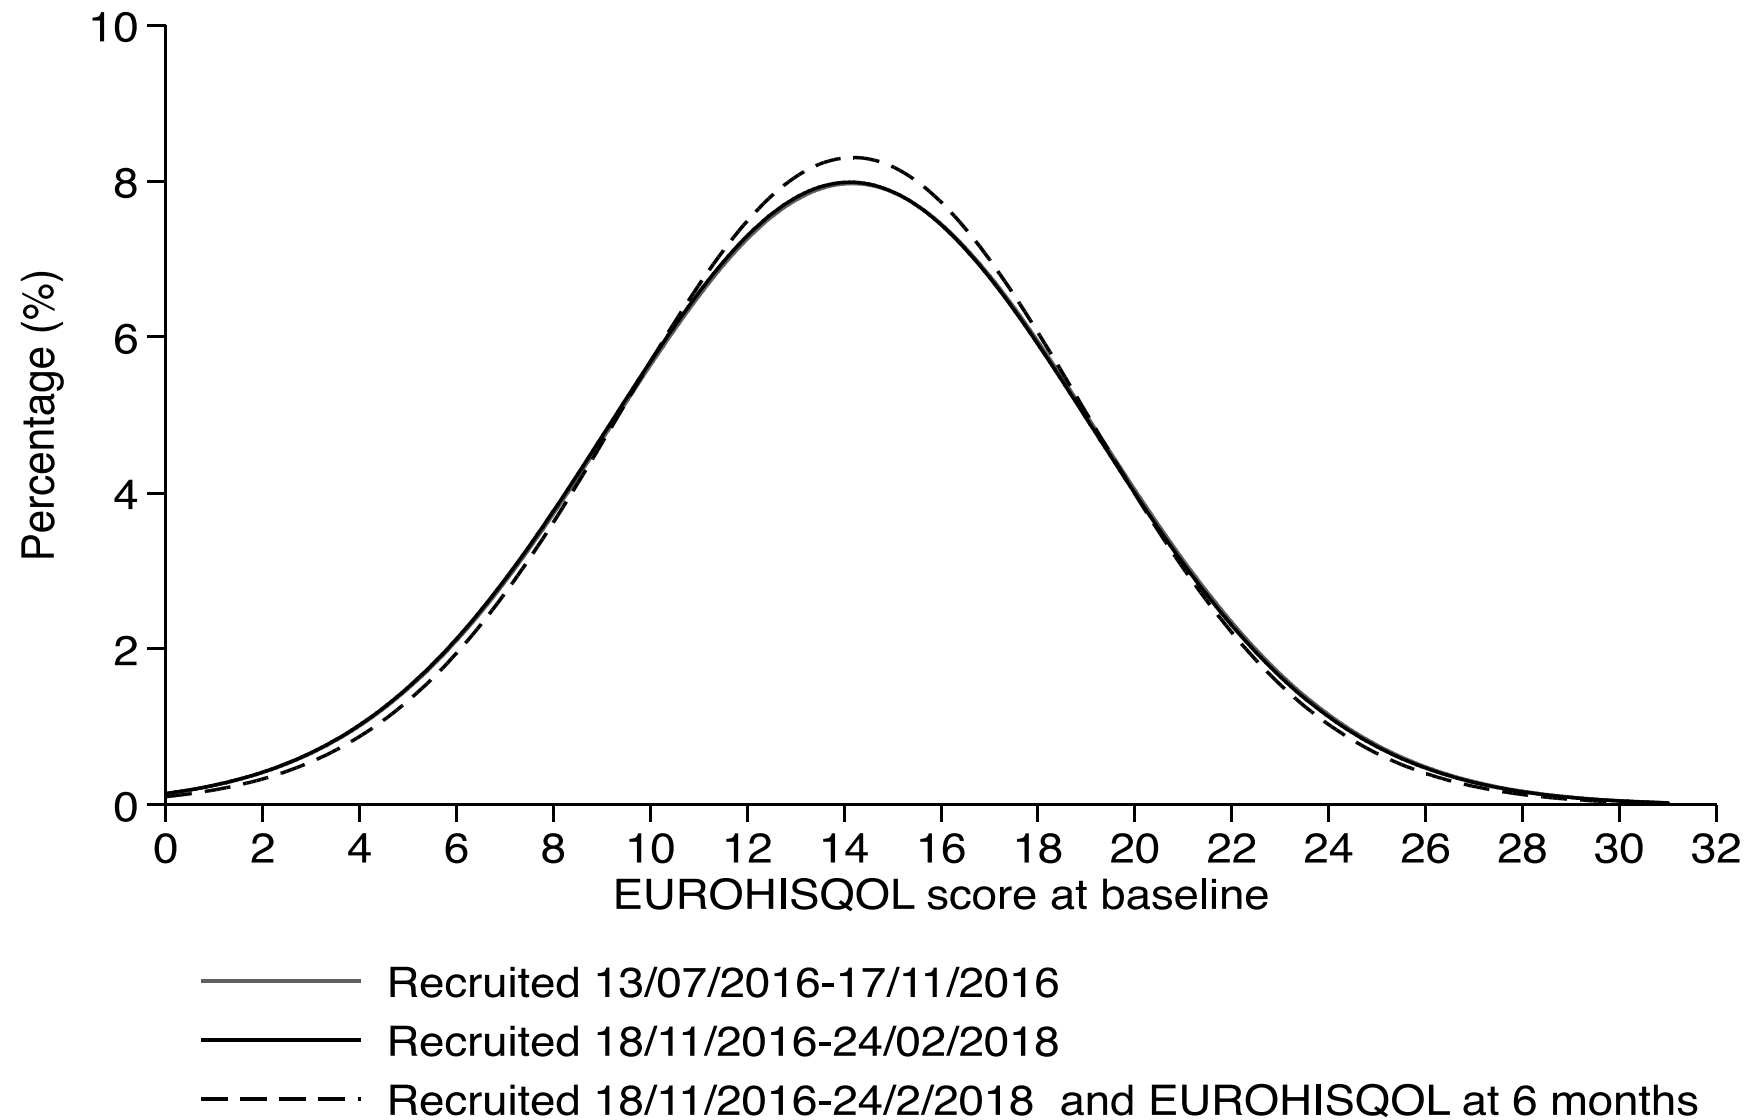

**SUPPLEMENTARY FIGURE S2. Distribution of quality of life (QOL) EUROHIS-QOL scores at baseline in patients ineligible for 6 month follow-up (N=300), patients eligible for 6 month follow-up (N=1224), and patients eligible for 6 month follow-up with successful follow-up (N=925).**

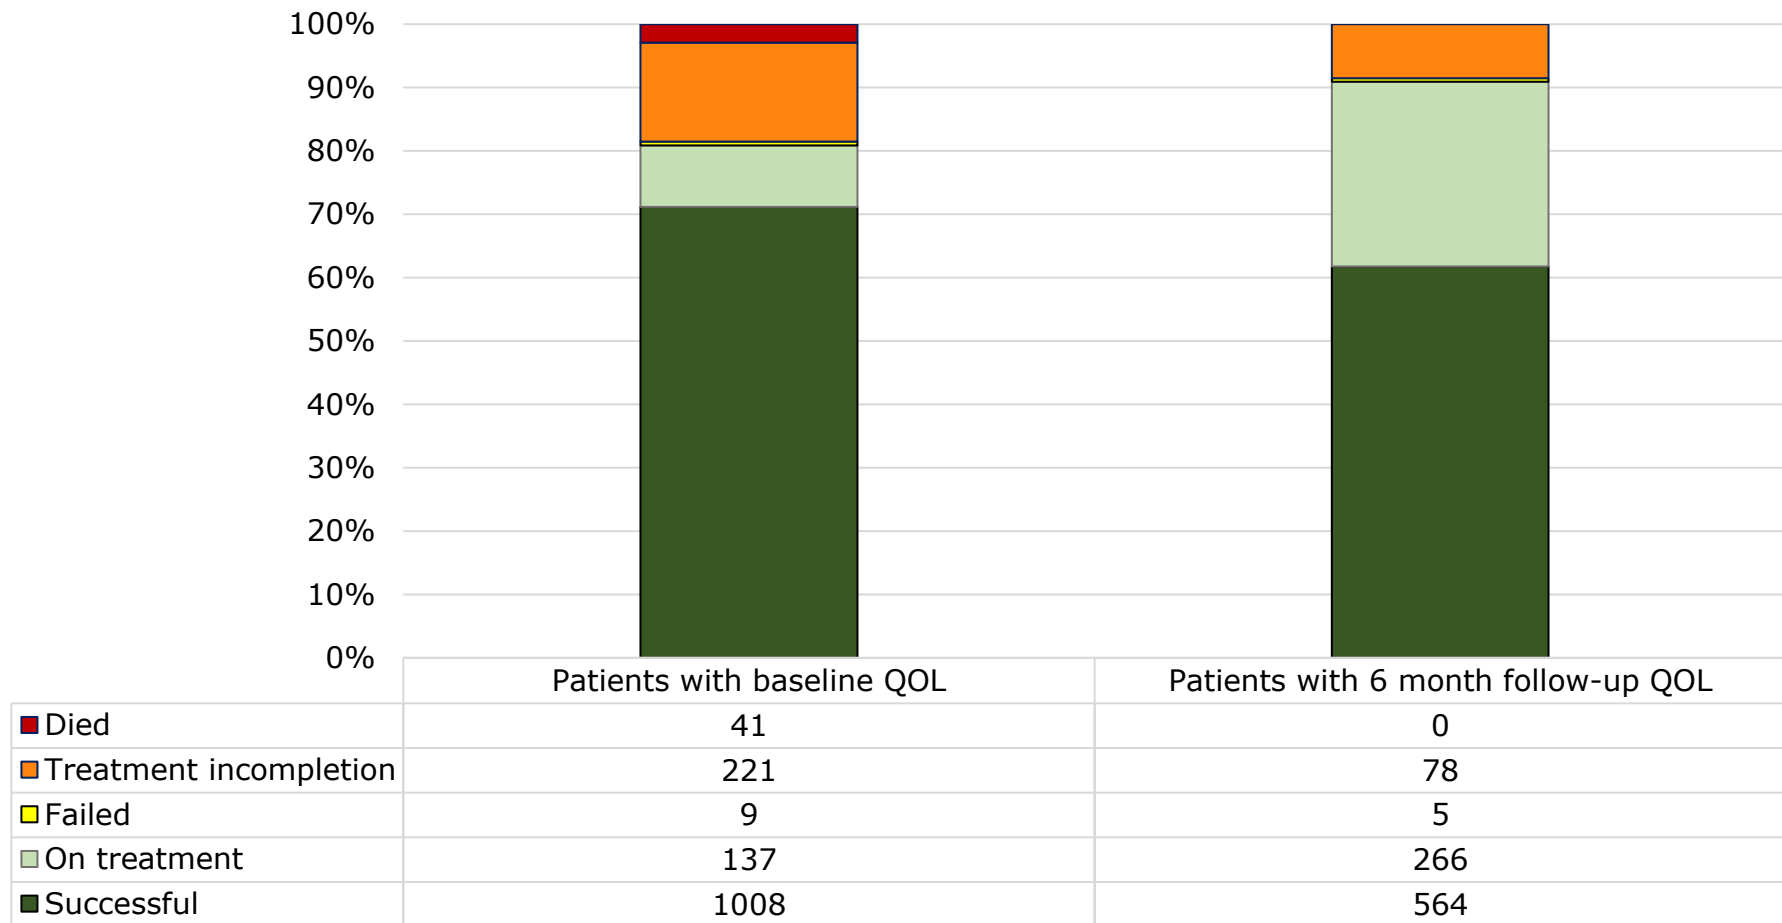

**SUPPLEMENTARY FIGURE S3. Treatment outcome** in patients with known outcome data who completed quality of life (QOL) EUROHIS-QOL questionnaires at baseline and in those with the repeated QOL data at 6-month follow-up. Note patients whose treatment outcome was unknown due to transfer of care or missing data (n=101 interviews at baseline, n=10 interviews at follow-up), or had their diagnosis rescinded after recruitment (n=7 interviews at baseline, n=2 interviews at follow-up), are not shown in this figure.

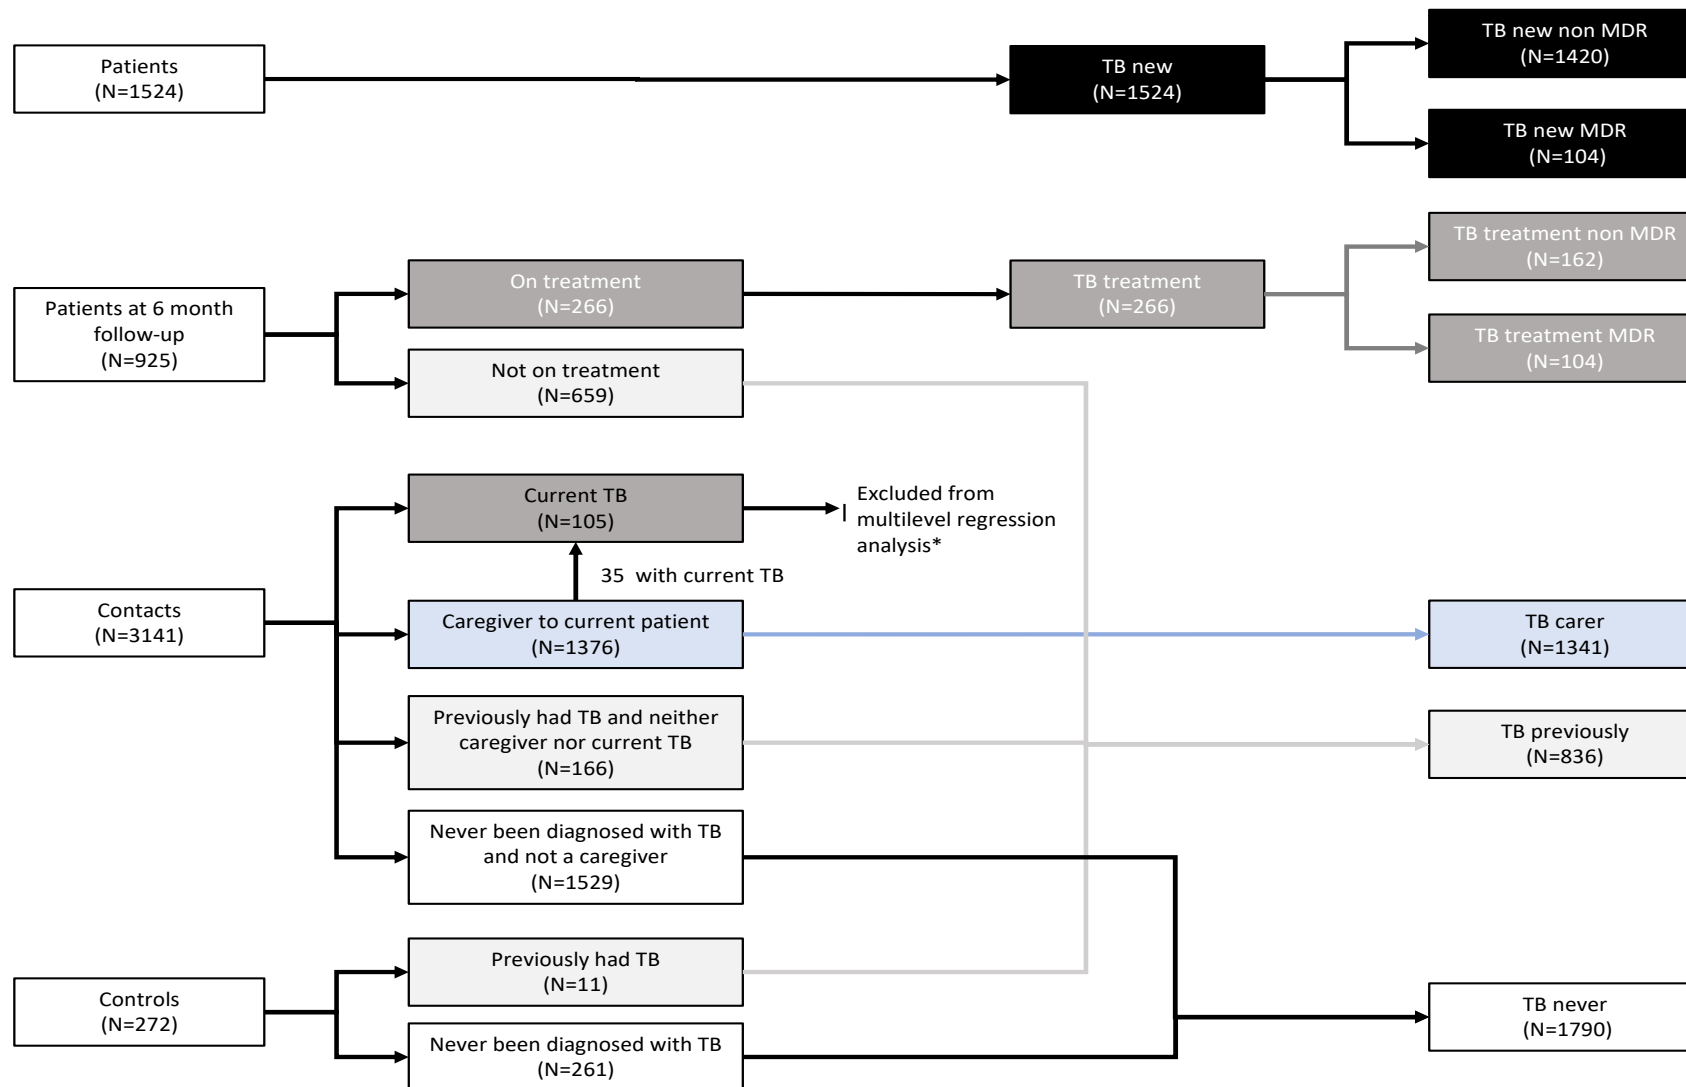

**SUPPLEMENTARY FIGURE S4. Patient allocation according to treatment status**



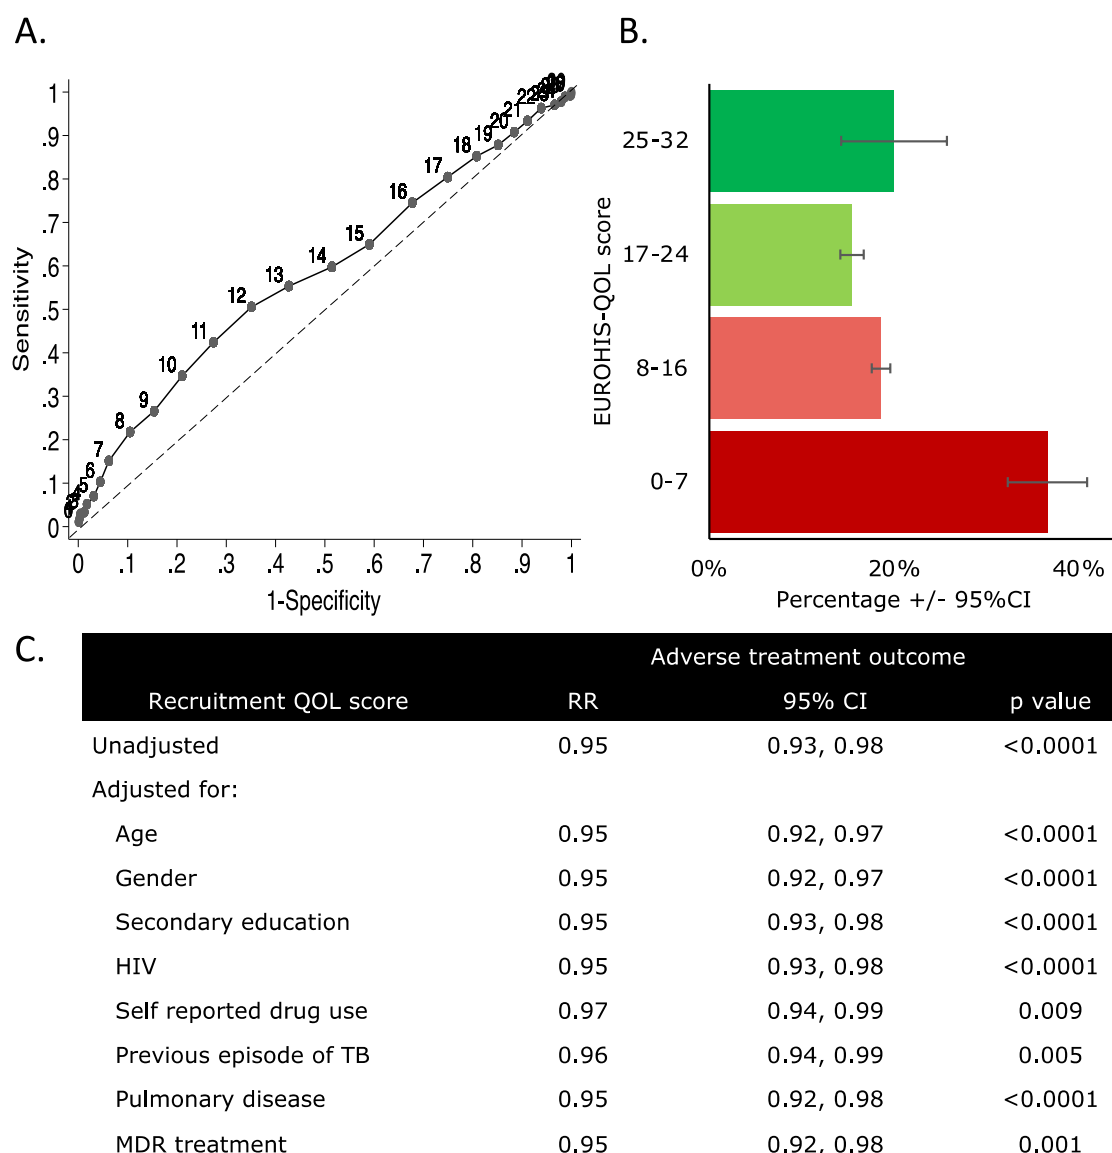

**SUPPLEMENTARY FIGURE S5. (A) Receiver operating curve, (B) bar graph, and (C) adjusted GLM regression of the EUROHIS-QOL score at baseline to predict adverse treatment outcome.** Regression compares patients who had an adverse treatment outcome during treatment (n=271), versus patients who had successful treatment (n=1008) or were still being treated (n=137). The area under the curve was 0.54 (95%CI=0.54-0.62). Results for death and incomplete treatment are shown in Figure 5 and SUPPLEMENTARY Figure 6. Low QOL at the time patients with TB commenced therapy, and especially severe illbeing (EUROHIS-QOL score=0-7) indicating being on average very dissatisfied in all 8 QOL questions predicted death, adverse treatment outcome and treatment non-completion. Interestingly, patients with the highest QOL indicating that they were more than satisfied in the 8 QOL questions also tended to be associated with a slightly higher risk of treatment non-completion. This trend supports our qualitative impression from the ongoing CRESIPT trial<sup>19</sup> that patients are at risk of not completing their therapy not only if they are suffering high psycho-socio-economic challenges, but paradoxically also if their symptoms are mild and their socioeconomic situation is unusually favourable. These findings and observations warrant prospective

study. Note: RR=risk ratio, CI=confidence interval; QOL=quality of life score in the EUROHIS-QOL tool.

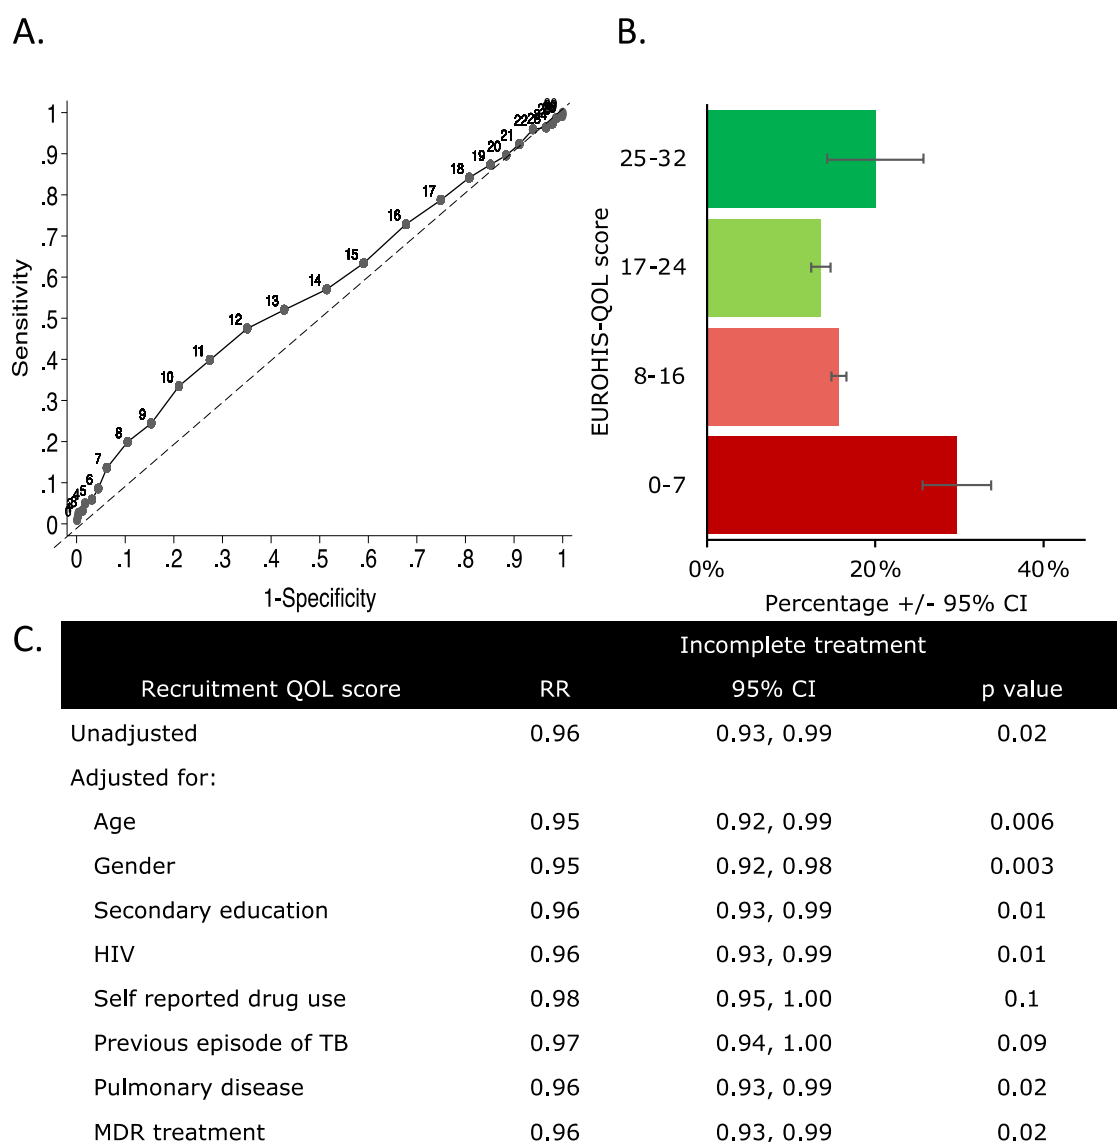

**SUPPLEMENTARY FIGURE S6. (A) Receiver operating curve, (B) bar graph, and (C) adjusted GLM regression of the EUROHIS-QOL score at baseline to predict incomplete treatment.** Regression compares patients who had incomplete treatment (n=221), versus patients who had successful treatment (n=1008) or were still being treated (n=137). The area under the curve was 0.56 (95%CI=0.52-0.61). Results for death and adverse treatment outcome are shown in Figure 5 and SUPPLEMENTARY Figure 5. Low QOL at the time patients with TB commenced therapy, and especially severe illbeing (EUROHIS-QOL score=0-7) indicating being on average very dissatisfied in all 8 QOL questions predicted death, adverse treatment outcome and treatment non-completion. Interestingly, patients with the highest QOL indicating that they were more than satisfied in the 8 QOL questions also tended to be associated with a slightly higher risk of treatment non-completion. This trend supports our qualitative impression from the ongoing CRESIPT trial<sup>19</sup> that patients are at risk of not completing their therapy not only if they are suffering high psycho-socio-economic challenges, but paradoxically also if their symptoms are mild and their socioeconomic situation is unusually favourable. These findings and observations warrant prospective study. Note: RR=risk ratio, CI=confidence interval; QOL=quality of life score in the EUROHIS-QOL tool.
